# Supplementary material for: Prediction of the Active Ingredients, Potential Targets, and Signaling Pathways in ZaoRenDiHuang Capsules for Treatment of Insomnia Based on Network Analysis and Molecular Docking
Source: Research Square preprint supplement (doi:10.21203/rs.3.rs-122890/v1), 2020-12-09
Supplement: Supplementary file 1 [file 80b0f49225ae3e9828f01cfa.xlsx]

## Sheet: Sheet1
Targets
POLB
AKR1B10
SAE1 UBA2
HSD11B1
PTPN1
PTGES
NR1H4
PTPN2
CDC25C
GPBAR1
TOP2A
RORC
PTPRF
ACP1
AR
PLA2G1B
CDC25B
CDC25A
CES2
PDE4D
FABP1
VDR
UGT2B7
PPARG
SCD
SERPINA6
SHBG
G6PD
CYP51A1
ALOX5AP
CYP19A1
HSD17B3
GABBR1
PRKCH
HSD11B2
PTPN11
TERT
TOP1
NPC1L1
SIGMAR1
CYP17A1
GABRA
PTGS2
MDM2
TLR9
FABP2
CD81
PTPN6
PTGER2
NR1H3
HMGCR
ESR1
ESR2
SREBF2
SLC6A2
CYP2C19
RORA
BCHE
SLC6A4
CHRM2
ACHE
NR1H2
GLRA1
PTGER1
PPARA
PPARD
DHCR7
SQLE
NR1I3
FDFT1
NOS2
NR3C1
NOX4
AKR1B1
XDH
TYR
FLT3
CA2
ALOX5
CA7
HSD17B2
ABCC1
HSD17B1
AHR
CA12
ESRRA
ABCB1
CYP1B1
ABCG2
ADORA1
CA4
MAOA
GLO1
SYK
GSK3B
MMP9
MMP2
ALOX15
ALOX12
PTPRS
ADORA2A
CDK5R1
CCNB3
ARG1
GPR35
DAPK1
MPG
SLC22A12
CDK6
CDK2
TTR
TNKS2
TNKS
CSNK2A1
EGFR
AVPR2
IGF1R
F2
PIM1
AURKB
DRD4
MPO
PIK3R1
PYGL
CA1
SRC
PTK2
KDR
MMP13
MMP3
CA3
PLK1
CA6
CDK1
PKN1
CA14
CA9
MET
NEK2
CXCR1
CAMK2B
ALK
AKT1
NEK6
CA5A
BACE1
AXL
NUAK1
AKR1C2
AKR1C1
AKR1C3
AKR1C4
CA13
AKR1A1
APP
PARP1
MMP12
CD38
CFTR
PFKFB3
AMY1A
GRK6
CYP2D6
CYP2C9
ESRRB
GPER1
ADCY10
ST6GAL1
HAO1
JAK1
JAK2
PGR
CHRM1
LGALS3
LGALS9
HSP90AA1
SSTR2
SSTR4
SSTR1
SSTR3
VEGFA
FGF1
FGF2
ADORA2B
ADORA3
F10
SERPINE1
EIF4H
PABPC1
MMP1
MMP7
MMP8
SLC29A1
HRAS
ADK
HK2
HK1
SSTR5
ADAM17
FUCA1
SLC28A3
GAPDH
ABL1
EPHA2
LCK
MAP3K9
FGFR1
METAP2
AURKA
BTK
HPSE
ADA
MME
BRD4
BRD2
FKBP1A
CDC7
PRKCA
PRSS1
CTRC
DRD2
JAK3
TYK2
LRRK2
CYP11B1
CYP11B2
PTGS1
KCNA5
TRPM8
PDE10A
TAAR1
CREBBP
PRKDC
LIPA
HTR1D
ABCC9
KCNJ11
MAPK14
ADRB2
ADRB1
ADRB3
PIK3CD
PIK3CB
AOC3
CXCR2
PDCD4
TLR8
TLR7
POLA1
PTP4A3
FTO
MAP3K14
MAP3K7
HDAC6
HDAC2
HDAC1
RXRA
PDK1
HNF4A
PDE5A
KIT
MAP2K2
MAPKAPK5
MAPK1
ACVRL1
CTSV
PLK4
CDK5
MKNK2
SORD
CCND1
GSK3A
MCL1
ELANE
ADCY1
MAP2K7
MAP2K1
RELA
FLT1
PDGFRB
FLT4
PDGFRA
MAPK3
PLG
PSEN2
PLAU
IRAK4
PRKCB
CDK2
RPS6KA3
PDE4B
PIK3CG
MAP3K1
PIK3CA
IMPDH1
P2RX7
OPRK1
JUN
P2RX3
PRKCD
NTRK1
GYS1
WEE1
CDK1
CCNE1
CDK7
CDK9
DYRK1A
HTR2B
ADRA2C
ADRA2B
RAC1
SAE1
CDC42
TEK
PLK3
PLK2
EPHB4
LYN
CFD
CSF1R
MAPK8
MAPK10
ROCK2
PRF1
HTR3A
MAPKAPK2
PGK1
MCHR1
MAPK9
HCRTR2
NAAA
ALDH2
TTK
LTA4H
CLK4
RAF1
BCAT2
MST1R
BMP4
CYP1A1
CCNC
CDK8
TGM2
GRM5
GRM1
GCK
MTOR
CTSS
HSP90AB1
CHEK2
CDK4
TGFBR2
SIRT2
MKNK1
ATR
PPIA
DHFR
IKBKE
KDM5B
TRPV1
TBK1
FGFR3
ZAP70
CLK1
DYRK2
KARS
MARK1
EPHX2
FPR2
PIM3
JAK3
RPS6KB1
GRIA1
GABRB3
GABRG2
GABRB1
IKBKB
HPGD
SLC1A3
TBXAS1
PARP2
CHRM4
CHEK1
TYMS
TRPC6
ICAM1
SELE
MAOB
LIMK1
SCN4A
F3
PARP10
RPS27
CCNA2 CDK2
NR3C2
IMPDH2
ROCK1
PRKACA
XBP1
PIM2
AGPAT2
SIRT3
SIRT1
GRK5
MAP4K4
NQO2
DRD3
CCNC
STAT3
DRD1
HTR7
HTR1A
ADRA1D
ADRA1A
SLC6A3
ADRA1B
DRD5
HTR2A
HCRTR1
HTR2C
TBXA2R
MTNR1B
PIK3CA
CHRNB4
CHRNA3
KCNN3
CHRNA4
KCNN1
KCNN2
MTNR1A
PPP1CA
CTSL
SCN9A
TGFBR1
HTR6
ADRA2A
CDK9
CHRNA3
OPRM1
HTR1B
SLC18A2
CTSK
GSTP1
GSTM2
GABRA5
GABRA2
QTRT1
NEK1
CSNK1G1
RPS6KA1
GAK
GABRG2
GABRA2
CLK3
EIF2AK3
CBFB
ITK
ALDH3A1
BACE2
CSNK1D
TRHR
ILK
CPT1A
ALDH1A1
ATP4B
FASN
MIF
OPRD1
CASP3
CASP7
PLA2G2A
CNR2
CDK5R1
FBP1
WNT3A
PDE7A
CCR1
MAPK11
PREP
FAP
AVPR1A
C5AR1
NAMPT
SMYD2
F2R
BRS3
SCN5A
CENPE
OXTR
CNR1
CHRM3
PER2
EPHX1
GABRA1
GABRG2
NR1I2
RET
PDE2A
LDHA
PDE9A
RHOA
CLK2
DYRK1B
LIMK2
DGAT1
NTRK2
KDM4E
CBR1
MAPT
INSR
MYLK
APEX1
CYP1A2
ODC1
HSP90B1
NAE1
TAS2R31
SLC5A2
PLA2G5
CES1
EDNRA
KLK1
KLK2
PLA2G10
CXCR4
PITRM1
ALPL
ERN1
DAO
ALPG
CTSB
SLC9A1
CCND3
TUBB3
KDM1A
PDE4C
HCK
GUSB
PI4KB
DUSP3
GRM4
MPEG1
XIAP
CALM1
PLA2G7
CCNB3
NQO1
PCSK7
FNTA FNTB
FYN
TACR2
PLA2G4A
CXCR1DD3
CHRNA7
STS
PGD
BCL2
CA5B
GRM2
DNMT1
MMP14
STAT1
FFAR1
SNCA
ST3GAL3
FUT7
FUT4
AURKC
RPS6KB2
KCNH2
IGFBP3
HIF1A
HSD17B14
TYMP
TUBB1
KCNMA1
LTB4R
DNM1
IDO1
ASF1A
MMP16
ACE
HCAR2
ECE1
ADAMTS4
AMPD2
CTSA
PTGER4
RBBP9
DPP4
SLC47A1
CHRNB4
PTPRCAP
GRIK2
ROCK2
IL2
PSEN2
PTAFR
S1PR3
S1PR1
RBP4
PPM1B
PPP1CC
PPP2CA
PPP2R5A
S1PR5
S1PR4
GALR2
GALR1
CETP
SHH
PSMB5
HLA-DRB1
CCR3
CALCRL
TACR3
MLNR
CPT2
SOAT1
NPY1R
SMO
CAPN1
TACR1
F11
LGMN
ACACB
PLAT
BDKRB1
SCARB1
PSENEN
PDE11A
KCNJ11
FPR1
ELOVL6
NPY5R
F9
SLC6A9
NCOR1
PRLHR
CACNA1C
FKBP5
PRCP
GRK2
CACNA1G
PGGT1B
SLC10A2
KIF11
TSPO
TNF
HTR5A
HRH2
TH
GCGR
PDF
ANPEP
PRKCG
QPCT
ASAH1
HDAC5
HDAC7
HDAC8
HDAC4
HDAC9
REN
CTSD
PAK4
UGCG
CTSE
GHSR
ERBB2
NOS1
LAP3
BRAF
BIRC2
CASP8
CASP1
HRH3
PRKCQ
HTR4
PRKCE
PDE1C
PDE8B
CCNE2
PDPK1
TNNI3K
GRK3
CCKBR
TLR4
QPCTL
PDE1A
CMA1
PDE1B
DYRK4
IRAK1
CSNK2A2
SLK
DYRK3
HIPK3
TAOK1
HIPK1
BAD
BRPF1
KLK5
ROS1
CRHR1
OPRL1
CCNE1
CCKAR
PSEN1
GPR139
RPS6KA2
MAP3K20
ATRD3
CDK2
CCNA1
THRA
THRB
CCNA2
TYRO3
DUT
MERTK
GABRA1
GPR88
TK1
PAK1
ADAM10
CX3CR1
CAPN1
BLK
CSK
BMX
FGR
FES
CCNA2
FAAH
PDE4A
MC4R
CSNK1A1
NOD1
PIP4K2C
MAP2
TRPC3
TGFB1
