# Supplementary material for: Prediction of the Active Ingredients, Potential Targets, and Signaling Pathways in ZaoRenDiHuang Capsules for Treatment of Insomnia Based on Network Analysis and Molecular Docking
Source: Research Square preprint supplement (doi:10.21203/rs.3.rs-122890/v1), 2020-12-09
Supplement: Supplementary file 2 [file a834bc836c56450f87b274da.xlsx]

## Sheet: Sheet1
Targets name
AR
VDR
PPARG
SHBG
CYP51A1
CYP19A1
CYP17A1
TLR9
PTPN6
HMGCR
ESR1
ESR2
SLC6A2
CYP2C19
BCHE
SLC6A4
ACHE
GLRA1
PPARD
DHCR7
FDFT1
NOS2
NR3C1
AHR
ABCB1
ADORA1
MAOA
GLO1
GSK3B
MMP9
MMP2
PTPRS
ADORA2A
TTR
F2
DRD4
MPO
PIK3R1
PYGL
CA1
MMP3
AKT1
BACE1
AKR1A1
APP
PARP1
CFTR
CYP2D6
GPER1
CHRM1
SSTR2
VEGFA
FGF2
SERPINE1
EIF4H
MMP7
SLC29A1
HRAS
ADK
HK1
SSTR5
GAPDH
FGFR1
BTK
ADA
PRKCA
DRD2
LRRK2
PTGS1
KCNA5
PDE10A
CREBBP
PRKDC
HTR1D
KCNJ11
ADRB2
ADRB1
TLR8
TLR7
HDAC6
HDAC1
CCND1
ADCY1
MAP2K1
RELA
FLT1
PSEN2
PLAU
RPS6KA3
PDE4B
PIK3CG
P2RX7
OPRK1
PRKCD
NTRK1
ADRA2C
ADRA2B
HTR3A
HCRTR2
ALDH2
MST1R
TGM2
GRM5
GCK
MTOR
PPIA
IKBKE
KDM5B
TBK1
FGFR3
FPR2
GRIA1
GABRB3
GABRG2
SLC1A3
ICAM1
SELE
MAOB
LIMK1
F3
NR3C2
XBP1
NQO2
DRD3
DRD1
HTR1A
ADRA1D
ADRA1A
SLC6A3
ADRA1B
DRD5
HTR2A
HCRTR1
HTR2C
MTNR1B
CHRNA4
MTNR1A
CTSL
HTR6
ADRA2A
OPRM1
HTR1B
SLC18A2
GABRA5
GABRA2
CLK3
EIF2AK3
CSNK1D
TRHR
CASP3
FBP1
AVPR1A
CNR1
PER2
GABRA1
RET
PDE2A
LIMK2
NTRK2
MAPT
INSR
CYP1A2
ODC1
HSP90B1
CES1
EDNRA
CTSB
TUBB3
GRM4
CHRNA7
STS
PGD
DNMT1
STAT1
SNCA
ST3GAL3
IGFBP3
HIF1A
ACE
GRIK2
IL2
HLA-DRB1
TACR3
TACR1
PLAT
ELOVL6
NCOR1
CACNA1C
FKBP5
CACNA1G
KIF11
TSPO
TNF
HTR5A
HRH2
TH
HDAC8
HDAC4
HDAC9
REN
CTSD
ERBB2
NOS1
BRAF
CASP8
CASP1
HRH3
HTR4
PDPK1
TNNI3K
TLR4
CCKAR
PSEN1
GPR139
THRA
THRB
ADAM10
FES
FAAH
MC4R
MAP2
TRPC3
